# Supplementary material for: CO2 capturing by self-assembled belt[14]pyridine encapsulated ionic liquid complexes: a DFT study
Source: Royal Society of Chemistry journal article supplement (doi:10.1039/d4ra03394a), 2024-01-01
Supplement: d4ra03394a1.pdf [file d4ra03394a1.pdf]

**CO<sub>2</sub> capturing by self-assembled belt[14]pyridine encapsulated ionic liquid complexes: A DFT study**

*Annum Ahsan<sup>a</sup>, Ahmed Lakhani<sup>b</sup>, Muhammad Umair Ashraf<sup>c</sup>, Muhammad Yar<sup>a, d</sup>, Sehrish Sarfaraz<sup>a</sup> & Khurshid Ayub<sup>a\*</sup>*

<sup>a</sup> Department of Chemistry, COMSATS University, Abbottabad Campus, KPK, Pakistan 22060

<sup>b</sup> Department of Biomedical and Health Sciences, Calumet College of St. Joseph, Whiting, Indiana 46394, United States

<sup>c</sup> Institute for Applied Physics, Department of Physics, University of Science and Technology Beijing, Beijing 100083, China

<sup>d</sup> Department of Chemistry, Cholistan University of Veterinary and Animal Sciences, Bahawalpur, Punjab, Pakistan 63100

Correspondence: khurshid@cuiatd.edu.pk (K. A.)

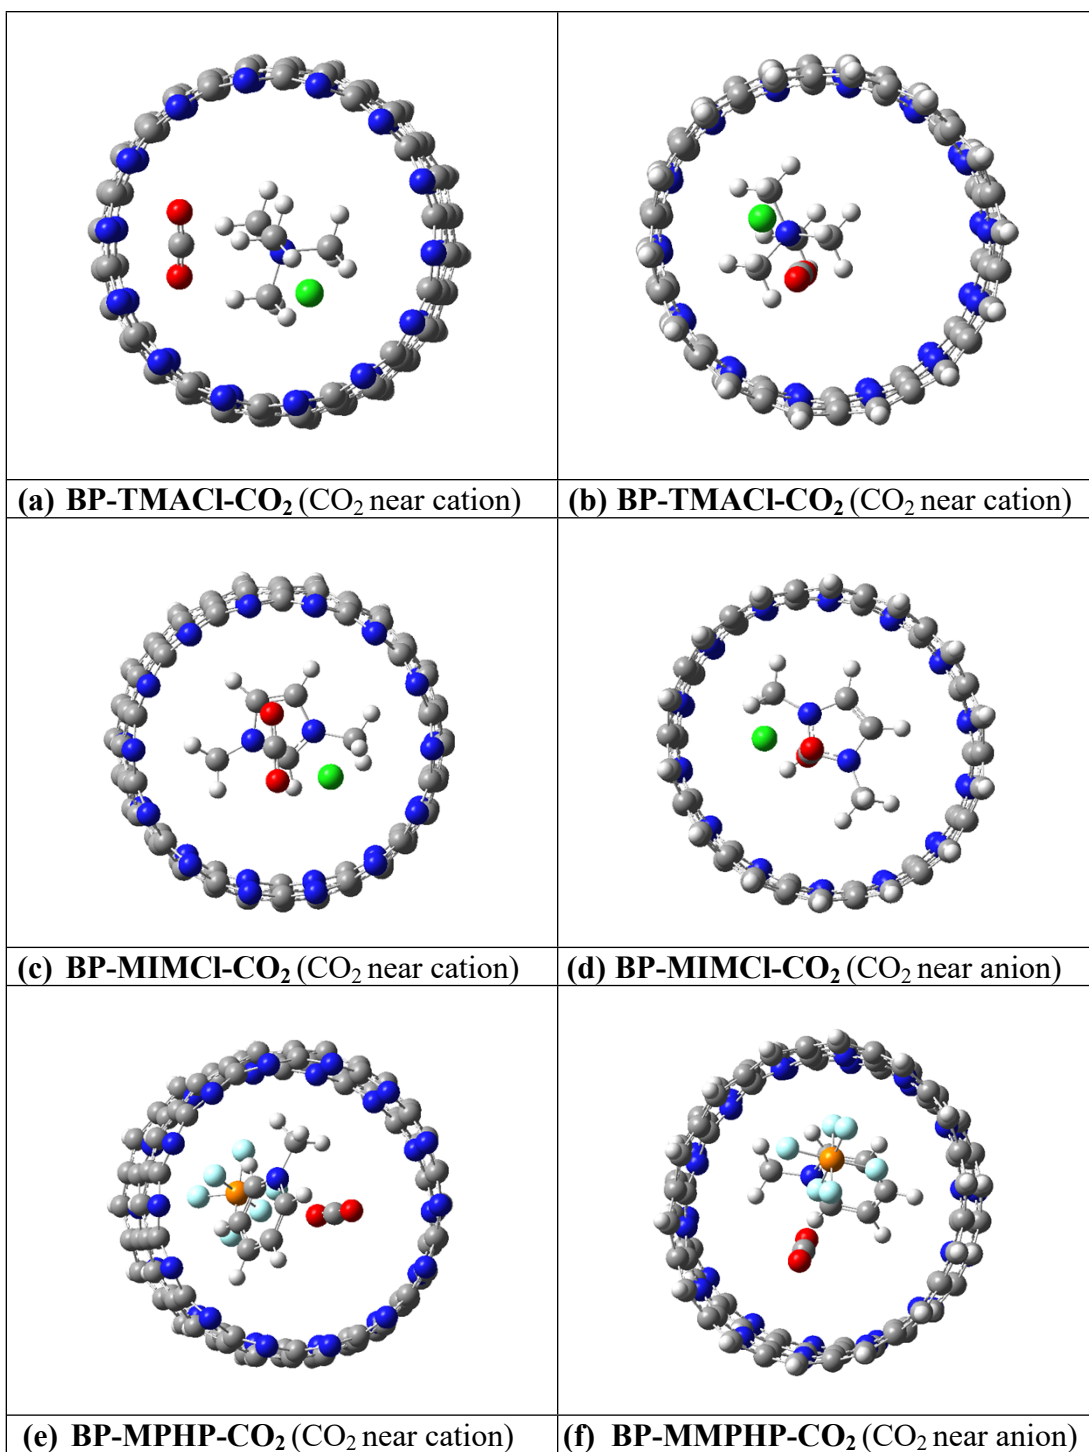

**Fig. S1:** Different initial orientations for CO<sub>2</sub> capturing by encapsulated ionic liquids.

## AIMD, Ab initio molecular dynamics analysis

We have studied the thermal stability of a belt[14]pyridine-encapsulated ionic liquids after CO<sub>2</sub> capture using ab initio molecular dynamics (AIMD) simulations. The simulations are performed using HSE06 hybrid functional along with projected augmented wave potential (pseudopotential) as implanted in VASP code [1]. HSE06 is a hybrid functional which is considered best to study geometrical, electronic and thermodynamic properties of the systems. HSE06 effectively captures exchange and correlation function which provides balance between local and non-local exchange contributions [2, 3].

Using the Nosé–Hoover heat bath scheme at 300 K with a 1 fs time step over 1 ps, we found that the average temperature and total free energy fluctuations remained nearly constant (Fig. S2 and S3), indicating thermal stability. The final structures (Fig. S2) attained as a result of simulation present minor distortion in the structures. Overall, the results show feasibility of the reaction of capturing of CO<sub>2</sub> by encapsulated ionic liquids.

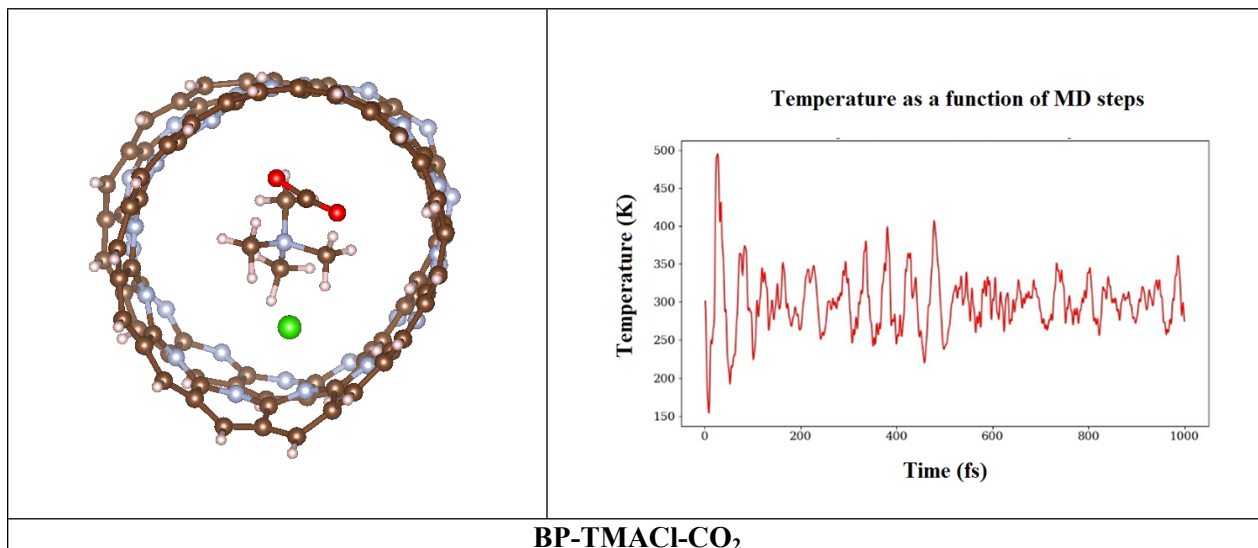

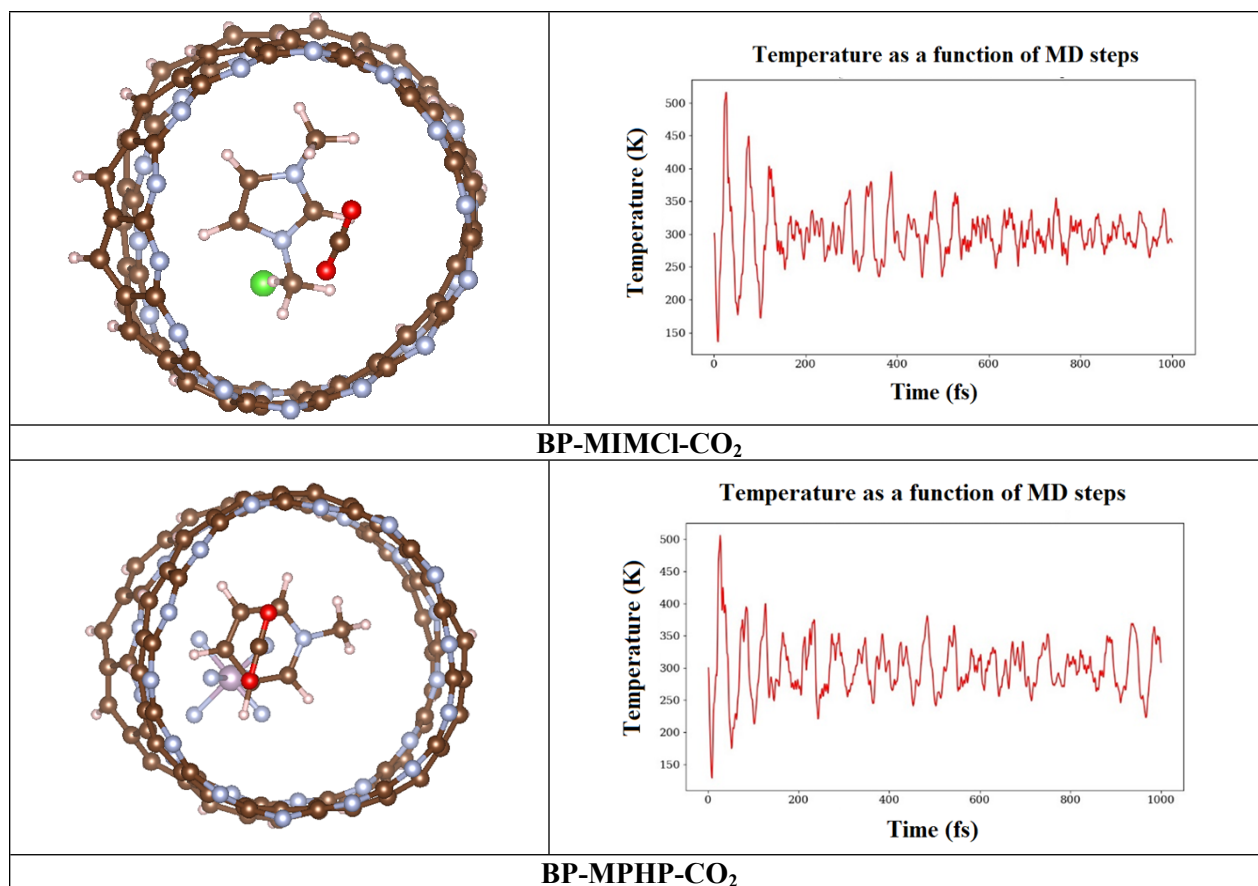

**Fig. S2:** Results of AIMD analysis studied at 300 K with a 1 fs time step.

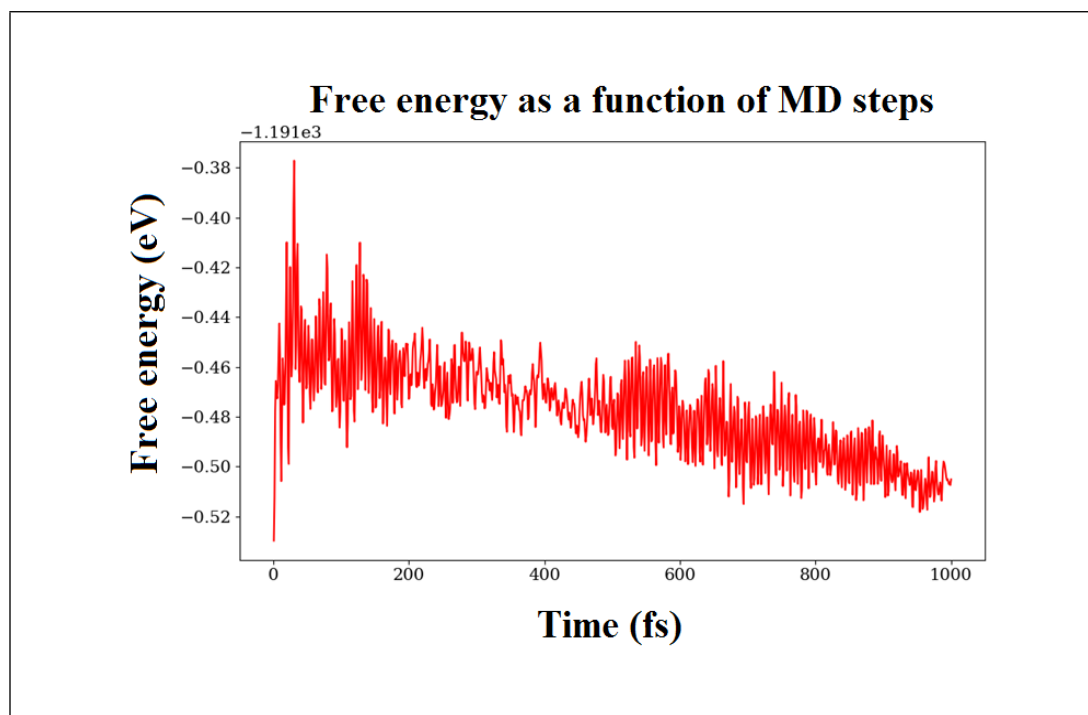

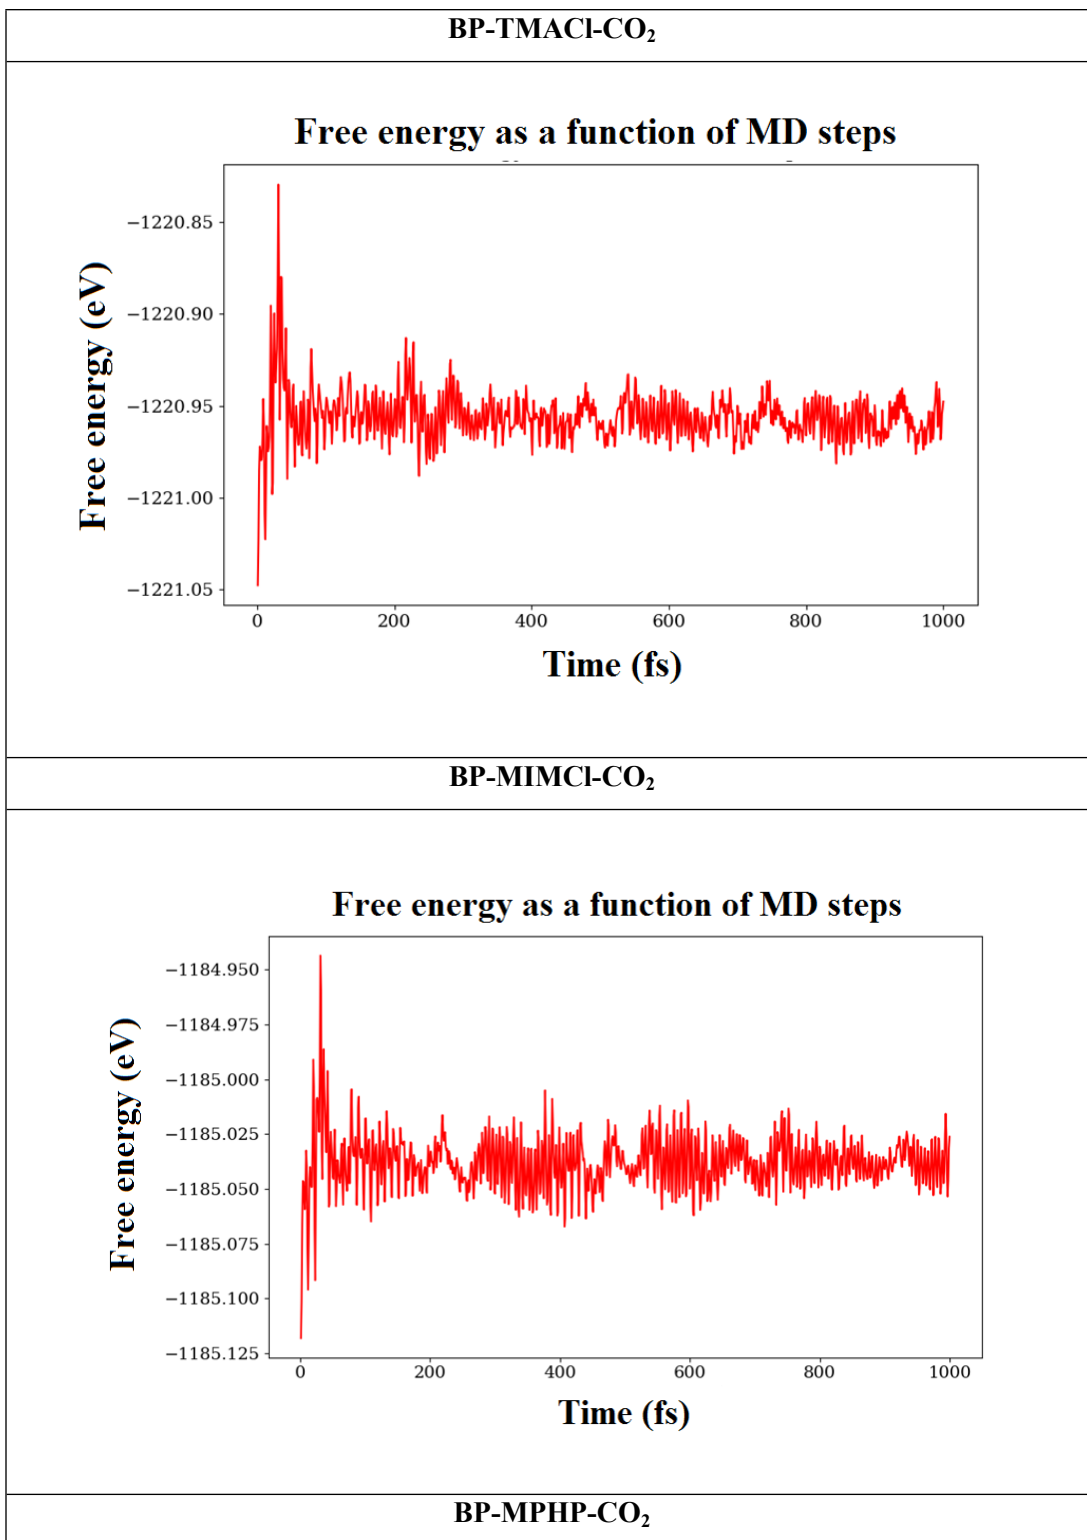

**Fig. S3:** Free energy as a function of MD time (in fs) at the temperature of 300K for BP-IL-CO<sub>2</sub> systems.

**BP-TMACl-CO<sub>2</sub> (Orientation 1-near cation)**

|   |             |             |            |
|---|-------------|-------------|------------|
| C | 1.81769700  | -4.56522200 | 4.09305200 |
| C | 2.02507000  | -4.72016300 | 2.64328500 |
| C | 3.17954700  | -4.18408100 | 2.06606800 |
| C | 3.96795900  | -3.33303000 | 2.84633300 |
| C | 3.66645800  | -3.20956800 | 4.28264500 |
| C | 4.80416200  | -2.38423900 | 2.24914400 |
| C | 5.10494500  | -1.23044100 | 2.97972800 |
| C | 4.73277900  | -1.17847200 | 4.40359100 |
| C | 5.42131500  | -0.03697700 | 2.32255600 |
| C | 5.12357500  | 1.16175300  | 2.97880800 |
| C | 4.75004300  | 1.11667500  | 4.40252000 |
| C | -0.43013000 | -5.02409300 | 3.89786100 |
| C | -0.31730800 | -5.18445600 | 2.43865500 |
| C | 0.94834300  | -5.12920600 | 1.85107600 |
| C | -2.67291700 | -4.52617600 | 3.74200700 |
| C | -2.65291200 | -4.67299600 | 2.27736400 |
| C | -1.47566400 | -5.09980400 | 1.66055900 |
| C | -4.51152100 | -3.14586800 | 3.64699400 |
| C | -4.58575700 | -3.26081500 | 2.18143600 |
| C | -3.69290900 | -4.11287100 | 1.52916900 |
| C | 4.84095000  | 2.31944300  | 2.24708400 |
| C | 4.01846600  | 3.28100500  | 2.84288500 |
| C | 3.71401300  | 3.16317600  | 4.27902600 |
| C | -5.56455400 | -1.10431000 | 3.60798400 |
| C | -5.71883400 | -1.15288600 | 2.14565700 |
| C | -5.30812400 | -2.30118500 | 1.46568700 |
| C | 3.24303500  | 4.14251200  | 2.06109600 |
| C | 2.09583600  | 4.69554000  | 2.63687500 |
| C | 1.88529400  | 4.54527500  | 4.08666900 |
| C | 1.02547200  | 5.11837600  | 1.84333700 |
| C | -0.23968200 | 5.19215600  | 2.42999600 |
| C | -0.35556800 | 5.03617300  | 3.88944500 |
| C | -1.39860200 | 5.12195500  | 1.65135100 |
| C | -2.58212900 | 4.71306700  | 2.26828800 |
| C | -2.60514800 | 4.56994000  | 3.73326200 |
| C | -3.62949600 | 4.16603600  | 1.52073000 |
| C | -4.53514200 | 3.32871600  | 2.17438500 |
| C | -4.46363700 | 3.21631900  | 3.64028900 |
| C | -5.27141400 | 2.37832700  | 1.46049200 |
| C | -5.70009000 | 1.23811400  | 2.14293500 |
| C | -5.54711200 | 1.19060800  | 3.60544200 |
| C | -5.91186300 | 0.04340200  | 1.45009600 |

|   |             |             |             |
|---|-------------|-------------|-------------|
| H | 3.33666000  | -4.24466000 | 0.99195800  |
| H | 5.01622600  | -2.43099000 | 1.18318900  |
| H | 5.65730900  | -0.03956700 | 1.26059300  |
| H | 1.05586700  | -5.19102300 | 0.77139000  |
| H | -1.41183300 | -5.15446800 | 0.57708200  |
| H | -3.67333800 | -4.16166300 | 0.44362100  |
| H | 5.05503000  | 2.36133800  | 1.18130800  |
| H | -5.33761100 | -2.33685300 | 0.38001200  |
| H | 3.40253300  | 4.19909200  | 0.98711300  |
| H | 1.13545800  | 5.17683300  | 0.76372800  |
| H | -1.33245900 | 5.17340000  | 0.56790500  |
| H | -3.60766100 | 4.21210900  | 0.43515600  |
| H | -5.29927400 | 2.41239100  | 0.37474900  |
| H | -5.97102700 | 0.04297700  | 0.36537200  |
| N | -1.61775700 | -4.85844100 | 4.50372300  |
| N | 2.72152800  | -3.95646700 | 4.87722900  |
| N | 4.74698400  | -0.03062000 | 5.10004600  |
| N | 2.77964500  | 3.92437900  | 4.87218000  |
| N | -1.54580700 | 4.88871300  | 4.49491400  |
| N | -5.10957800 | 2.24733300  | 4.31008000  |
| N | -5.14261200 | -2.16584700 | 4.31488500  |
| N | -5.66807200 | 0.04477100  | 4.29634800  |
| N | -3.62154400 | 3.96560100  | 4.37089600  |
| N | 0.72269200  | 4.87543800  | 4.67341500  |
| N | 4.23032300  | 2.18126700  | 5.03510200  |
| N | 4.19768400  | -2.23466800 | 5.03743800  |
| N | 0.65082100  | -4.87770300 | 4.68096300  |
| N | -3.67999600 | -3.90565500 | 4.37886800  |
| C | 2.37541400  | -4.36635700 | -2.05545600 |
| C | 2.57903100  | -4.56925300 | -3.49600300 |
| C | 3.76506100  | -4.09715000 | -4.06685300 |
| C | 4.60049200  | -3.28047100 | -3.30607600 |
| C | 4.31738400  | -3.13625400 | -1.87194900 |
| C | 5.50039000  | -2.38822900 | -3.89674400 |
| C | 5.87836700  | -1.25814800 | -3.17334000 |
| C | 5.53896800  | -1.20085300 | -1.74573500 |
| C | 6.21647600  | -0.06800600 | -3.82155400 |
| C | 5.91719900  | 1.13092700  | -3.17098800 |
| C | 5.57469900  | 1.08143100  | -1.74387600 |
| C | 0.11035700  | -4.78853000 | -2.24287900 |
| C | 0.22054800  | -5.02098300 | -3.68980600 |
| C | 1.49483100  | -4.99955600 | -4.26376200 |
| C | -2.15310400 | -4.36110600 | -2.40812300 |
| C | -2.14155200 | -4.57910800 | -3.86232300 |
| C | -0.95275700 | -5.01726500 | -4.45103500 |
| C | -4.06792300 | -3.08520400 | -2.53634400 |

|   |             |             |             |
|---|-------------|-------------|-------------|
| C | -4.13647600 | -3.23935800 | -3.99792300 |
| C | -3.22596300 | -4.10463900 | -4.60968800 |
| C | 5.57128900  | 2.27203500  | -3.89347900 |
| C | 4.69199200  | 3.18469700  | -3.30325100 |
| C | 4.40386800  | 3.04654700  | -1.86956400 |
| C | -5.21324800 | -1.09463700 | -2.61262000 |
| C | -5.31579100 | -1.14767700 | -4.07893100 |
| C | -4.89903900 | -2.31616000 | -4.72373200 |
| C | 3.87349900  | 4.01660400  | -4.06561200 |
| C | 2.69543700  | 4.51021200  | -3.49644100 |
| C | 2.48696100  | 4.31352500  | -2.05572800 |
| C | 1.61975300  | 4.95727100  | -4.26615000 |
| C | 0.34557200  | 5.00283200  | -3.69320000 |
| C | 0.23005400  | 4.77560900  | -2.24592100 |
| C | -0.82679800 | 5.01966900  | -4.45533800 |
| C | -2.02466700 | 4.60708800  | -3.86647700 |
| C | -2.04139300 | 4.39154400  | -2.41203500 |
| C | -3.11888300 | 4.15559300  | -4.61362300 |
| C | -4.04974800 | 3.31301900  | -4.00093100 |
| C | -3.98462000 | 3.15853300  | -2.53929700 |
| C | -4.83551900 | 2.40873200  | -4.72585700 |
| C | -5.28303000 | 1.25244000  | -4.07994900 |
| C | -5.18149300 | 1.19805400  | -2.61362000 |
| C | -5.51101900 | 0.05491100  | -4.76785400 |
| H | 3.93547000  | -4.20654500 | -5.13332600 |
| H | 5.70678000  | -2.44934900 | -4.96035600 |
| H | 6.44038700  | -0.07059500 | -4.88322700 |
| H | 1.61126700  | -5.14501200 | -5.33348000 |
| H | -0.90296100 | -5.17348400 | -5.52449500 |
| H | -3.23968700 | -4.23516200 | -5.68761500 |
| H | 5.77976900  | 2.32847900  | -4.95691300 |
| H | -4.95157600 | -2.38844700 | -5.80588800 |
| H | 4.04663300  | 4.12135100  | -5.13207900 |
| H | 1.73955500  | 5.09815700  | -5.33609300 |
| H | -0.77324100 | 5.17276200  | -5.52906800 |
| H | -3.12944100 | 4.28515700  | -5.69170600 |
| H | -4.88642000 | 2.48148400  | -5.80806600 |
| H | -5.57486300 | 0.05534600  | -5.85178100 |
| N | -1.08005200 | -4.61400800 | -1.64585700 |
| N | 3.31334500  | -3.80245700 | -1.27995800 |
| N | 5.63420000  | -0.06158300 | -1.04175700 |
| N | 3.41396700  | 3.73422300  | -1.27852300 |
| N | -0.96387800 | 4.62406100  | -1.64953300 |
| N | -4.71086000 | 2.22795300  | -1.89601300 |
| N | -4.77097200 | -2.13646500 | -1.89400500 |
| N | -5.37136600 | 0.05434100  | -1.93534100 |



|    |             |             |             |
|----|-------------|-------------|-------------|
| N  | -3.09329700 | 3.82654900  | -1.79518200 |
| N  | 1.30823700  | 4.58382600  | -1.47144700 |
| N  | 5.01725200  | 2.12523300  | -1.11133500 |
| N  | 4.95216000  | -2.22920700 | -1.11424400 |
| N  | 1.19247000  | -4.61412900 | -1.46974300 |
| N  | -3.19261600 | -3.77338900 | -1.79158700 |
| N  | 1.21051200  | -0.00491300 | -0.05522800 |
| C  | 0.77549800  | 1.23884600  | -0.79203600 |
| C  | 0.77055500  | -1.23558600 | -0.81085400 |
| C  | 0.63214700  | -0.01451600 | 1.32771200  |
| C  | 2.71529500  | -0.00851200 | 0.01867600  |
| H  | 1.19896400  | 1.19272700  | -1.79614300 |
| H  | -0.31059900 | 1.26619200  | -0.83673000 |
| H  | 1.15251700  | 2.11478300  | -0.26683600 |
| H  | 1.14167200  | -2.12086100 | -0.29710000 |
| H  | -0.31556300 | -1.25626700 | -0.85803200 |
| H  | 1.19620600  | -1.17682800 | -1.81347400 |
| H  | 0.97161600  | -0.91043700 | 1.84578400  |
| H  | 0.97480400  | 0.87201800  | 1.85963400  |
| H  | -0.45544700 | -0.01197300 | 1.26616100  |
| H  | 3.04179400  | -0.91122700 | 0.52817400  |
| H  | 3.08765700  | 0.00111500  | -1.00102600 |
| H  | 3.04497300  | 0.88240400  | 0.54655100  |
| Cl | 2.77106000  | 0.01759400  | -3.53684800 |
| C  | -2.76242100 | 0.01082200  | -0.64755300 |
| O  | -2.39829700 | 0.00682000  | -1.75162100 |
| O  | -3.04531400 | 0.01426900  | 0.47607300  |

**BP-TMACl-CO<sub>2</sub> (Orientation 2-near anion)**

|   |            |             |            |
|---|------------|-------------|------------|
| C | 5.00755300 | -1.52055400 | 4.10564200 |
| C | 5.07580800 | -1.87332400 | 2.67820500 |
| C | 5.49416900 | -0.90041000 | 1.76489100 |
| C | 5.61478400 | 0.41674100  | 2.21854800 |
| C | 5.52538200 | 0.67800500  | 3.66443100 |
| C | 5.50243700 | 1.49337000  | 1.33306700 |
| C | 5.09125800 | 2.72665300  | 1.84793500 |
| C | 5.02340400 | 2.89579200  | 3.30857500 |
| C | 4.45878200 | 3.67037300  | 1.03235000 |
| C | 3.61116300 | 4.60101100  | 1.64061600 |
| C | 3.60217100 | 4.69496300  | 3.10946000 |
| C | 3.57342500 | -3.26584800 | 4.54547200 |
| C | 3.58164900 | -3.69111000 | 3.13624600 |
| C | 4.43655200 | -3.03834200 | 2.24267300 |
| C | 1.50353300 | -4.20825900 | 4.89586300 |
| C | 1.42593000 | -4.67363900 | 3.50154900 |
| C | 2.53685300 | -4.49608700 | 2.67141100 |

|   |             |             |             |
|---|-------------|-------------|-------------|
| C | -0.78929500 | -4.16089400 | 5.08721700  |
| C | -0.96247500 | -4.62198500 | 3.70030100  |
| C | 0.17143600  | -4.97927100 | 2.96471200  |
| C | 2.57122000  | 5.20063200  | 0.92295400  |
| C | 1.46344200  | 5.66591800  | 1.63760100  |
| C | 1.54068800  | 5.71776300  | 3.10645600  |
| C | -2.85053600 | -3.13698700 | 5.08356700  |
| C | -3.10905200 | -3.55480700 | 3.69623500  |
| C | -2.18775500 | -4.39586800 | 3.06525600  |
| C | 0.21045800  | 5.77719400  | 1.02612400  |
| C | -0.92459000 | 5.71167600  | 1.83952000  |
| C | -0.75194700 | 5.76190100  | 3.30027500  |
| C | -2.15414200 | 5.29153500  | 1.32213600  |
| C | -3.08098200 | 4.73148800  | 2.20639900  |
| C | -2.82204400 | 4.82039000  | 3.65254200  |
| C | -4.05515600 | 3.83721200  | 1.75150400  |
| C | -4.57777600 | 2.91677100  | 2.66493700  |
| C | -4.25859600 | 3.07740200  | 4.09266100  |
| C | -5.11492000 | 1.70184300  | 2.22861400  |
| C | -5.11629900 | 0.62705300  | 3.12307700  |
| C | -4.77587800 | 0.87886100  | 4.53253600  |
| C | -5.12049300 | -0.69125500 | 2.65789900  |
| C | -4.59133200 | -1.68250700 | 3.49063900  |
| C | -4.27333800 | -1.33886200 | 4.88595400  |
| C | -4.07598600 | -2.86692300 | 2.95613700  |
| H | 5.50361200  | -1.11653000 | 0.69932000  |
| H | 5.51336000  | 1.32379000  | 0.25920300  |
| H | 4.44671800  | 3.54373900  | -0.04737400 |
| H | 4.42637000  | -3.29603300 | 1.18634800  |
| H | 2.48800300  | -4.78125000 | 1.62337500  |
| H | 0.07684900  | -5.27293200 | 1.92224500  |
| H | 2.52315200  | 5.10421200  | -0.15883500 |
| H | -2.32777300 | -4.67722700 | 2.02449700  |
| H | 0.11587700  | 5.69043200  | -0.05362700 |
| H | -2.29548900 | 5.19695100  | 0.24813400  |
| H | -4.23347300 | 3.71384000  | 0.68586900  |
| H | -5.31390300 | 1.53789200  | 1.17212300  |
| H | -5.31868500 | -0.90137100 | 1.60955200  |
| H | -4.25317200 | -3.11915000 | 1.91347900  |
| N | 2.62851300  | -3.68040800 | 5.40529200  |
| N | 5.39559700  | -0.31661900 | 4.55759800  |
| N | 4.42852500  | 3.96024200  | 3.87179500  |
| N | 0.45398300  | 5.93269200  | 3.86623800  |
| N | -3.53681600 | 4.11578700  | 4.54538500  |
| N | -4.53550900 | -0.12328200 | 5.39403600  |
| N | -1.79258300 | -3.59104900 | 5.77521300  |

|   |             |             |             |
|---|-------------|-------------|-------------|
| N | -3.55936700 | -2.15999900 | 5.67335200  |
| N | -4.52802000 | 2.11657100  | 4.99189100  |
| N | -1.75855000 | 5.47772300  | 4.14325500  |
| N | 2.66228400  | 5.39164800  | 3.76935300  |
| N | 5.40372300  | 1.92320500  | 4.15322700  |
| N | 4.40594500  | -2.31695000 | 5.00436700  |
| N | 0.41548000  | -4.13449100 | 5.68008400  |
| C | 4.40264300  | -2.60804300 | -2.08195400 |
| C | 4.47928100  | -2.96253100 | -3.50496600 |
| C | 4.91508500  | -1.99117800 | -4.40723500 |
| C | 5.01968900  | -0.67149200 | -3.96325100 |
| C | 4.91987400  | -0.41238600 | -2.52095700 |
| C | 4.91528100  | 0.40812400  | -4.84065900 |
| C | 4.48251400  | 1.63821400  | -4.33738000 |
| C | 4.40769000  | 1.80236100  | -2.87934500 |
| C | 3.85979800  | 2.59211000  | -5.14498500 |
| C | 2.99373600  | 3.51436700  | -4.54886800 |
| C | 2.97853500  | 3.59940400  | -3.08179100 |
| C | 2.95312200  | -4.34072100 | -1.64963800 |
| C | 2.96036300  | -4.76487400 | -3.05605000 |
| C | 3.83825200  | -4.12467800 | -3.93461500 |
| C | 0.87242900  | -5.26788300 | -1.30360000 |
| C | 0.79080700  | -5.73302300 | -2.69502500 |
| C | 1.91213400  | -5.56418900 | -3.51348600 |
| C | -1.42425400 | -5.21654100 | -1.11052900 |
| C | -1.60444800 | -5.68950800 | -2.49052500 |
| C | -0.46514600 | -6.05329500 | -3.21554300 |
| C | 1.96320200  | 4.13770500  | -5.25863700 |
| C | 0.84210200  | 4.59075400  | -4.55600600 |
| C | 0.91513800  | 4.62776900  | -3.08818300 |
| C | -3.49029100 | -4.19345400 | -1.11244400 |
| C | -3.76196300 | -4.62484500 | -2.49189800 |
| C | -2.84419800 | -5.48405100 | -3.10452300 |
| C | -0.41203800 | 4.73686200  | -5.15876200 |
| C | -1.55540500 | 4.65171400  | -4.35829400 |
| C | -1.38106200 | 4.68507100  | -2.89835100 |
| C | -2.80106600 | 4.26392300  | -4.86491200 |
| C | -3.72720200 | 3.68061000  | -3.99438900 |
| C | -3.46096200 | 3.75687600  | -2.54962200 |
| C | -4.72832300 | 2.80721000  | -4.43427900 |
| C | -5.23884600 | 1.86514400  | -3.53502500 |
| C | -4.90918000 | 2.01985500  | -2.10945600 |
| C | -5.80439200 | 0.65546700  | -3.95186200 |
| C | -5.78434300 | -0.43232000 | -3.07201300 |
| C | -5.43089900 | -0.17938300 | -1.66665400 |
| C | -5.81222200 | -1.75836300 | -3.51454200 |

|   |             |             |             |
|---|-------------|-------------|-------------|
| C | -5.25639100 | -2.75008000 | -2.69853500 |
| C | -4.92186300 | -2.39778200 | -1.31065700 |
| C | -4.75523500 | -3.95029800 | -3.21084900 |
| H | 4.95858200  | -2.21406700 | -5.46842200 |
| H | 4.96070200  | 0.24412300  | -5.91266600 |
| H | 3.88284800  | 2.48753300  | -6.22539000 |
| H | 3.85221900  | -4.39767900 | -4.98490000 |
| H | 1.87596000  | -5.87082600 | -4.55394300 |
| H | -0.55787000 | -6.37902900 | -4.24654000 |
| H | 1.93847200  | 4.07986900  | -6.34267100 |
| H | -3.00328900 | -5.81115200 | -4.12760100 |
| H | -0.50175900 | 4.70134800  | -6.24038600 |
| H | -2.95997000 | 4.21737800  | -5.93813600 |
| H | -4.94307500 | 2.71753700  | -5.49494300 |
| H | -6.04966400 | 0.50260100  | -4.99852300 |
| H | -6.05616000 | -1.98069600 | -4.54891300 |
| H | -4.97221500 | -4.23619900 | -4.23572500 |
| N | 2.00293800  | -4.75511900 | -0.79397500 |
| N | 4.80299400  | -1.40925300 | -1.62959500 |
| N | 3.80787500  | 2.86817600  | -2.32146200 |
| N | -0.17462700 | 4.84731800  | -2.33354800 |
| N | -4.18406100 | 3.05668200  | -1.66077600 |
| N | -5.18886300 | -1.18172700 | -0.80753600 |
| N | -2.42961500 | -4.64565300 | -0.42541600 |
| N | -4.20205800 | -3.21610800 | -0.52712300 |
| N | -5.18553300 | 1.06013900  | -1.21249800 |
| N | -2.39370400 | 4.40743200  | -2.06079600 |
| N | 2.03480100  | 4.29696300  | -2.42688400 |
| N | 4.80017800  | 0.83503600  | -2.03625900 |
| N | 3.80137900  | -3.40951800 | -1.18687000 |
| N | -0.21838000 | -5.19275900 | -0.52162200 |
| N | 0.28828900  | -0.06547100 | -0.20752600 |
| C | -0.98004700 | -0.09047800 | -1.01955400 |
| C | 0.90517000  | -1.44292900 | -0.21799000 |
| C | -0.01840300 | 0.34828000  | 1.19990600  |
| C | 1.25450100  | 0.91022300  | -0.83460000 |
| H | -0.72144700 | -0.38977300 | -2.03588700 |
| H | -1.66957500 | -0.80341400 | -0.56853600 |
| H | -1.42053000 | 0.90602000  | -1.00714200 |
| H | 1.82502600  | -1.41907100 | 0.36234800  |
| H | 0.19922000  | -2.14971500 | 0.21534600  |
| H | 1.12460600  | -1.69644500 | -1.25537200 |
| H | 0.90643000  | 0.36733500  | 1.77384100  |
| H | -0.46803300 | 1.33989300  | 1.18860200  |
| H | -0.71068200 | -0.36909800 | 1.63755000  |
| H | 2.18036100  | 0.90501300  | -0.26339000 |

|    |             |             |             |
|----|-------------|-------------|-------------|
| H  | 1.44457100  | 0.57413000  | -1.85504700 |
| H  | 0.80978100  | 1.90425100  | -0.82277500 |
| Cl | 1.34464100  | -1.18539800 | -3.76841700 |
| C  | -1.34204800 | -2.48073400 | -4.87155500 |
| O  | -0.78499600 | -3.36660400 | -5.37515300 |
| O  | -1.99654400 | -1.64470900 | -4.39922000 |

**BP-MIMCl-CO<sub>2</sub> (Orientation 1-near cation)**

|   |             |             |            |
|---|-------------|-------------|------------|
| C | 3.87569700  | 3.92047400  | 3.56410000 |
| C | 4.10321400  | 3.86038200  | 2.11091000 |
| C | 3.28088600  | 4.61548600  | 1.27202700 |
| C | 2.15294200  | 5.22253200  | 1.83170300 |
| C | 2.00692700  | 5.23367500  | 3.29648700 |
| C | 1.04127200  | 5.53284000  | 1.04492600 |
| C | -0.20159600 | 5.63527400  | 1.67347900 |
| C | -0.25441500 | 5.63273900  | 3.14439000 |
| C | -1.38521700 | 5.43732500  | 0.95785900 |
| C | -2.52374700 | 5.04725700  | 1.66477900 |
| C | -2.48504100 | 5.06599900  | 3.13591400 |
| C | 4.96457700  | 1.92382000  | 3.89041100 |
| C | 5.24584400  | 1.78444500  | 2.45206500 |
| C | 4.89900300  | 2.83161200  | 1.59605000 |
| C | 5.02117700  | -0.35124500 | 4.19996300 |
| C | 5.30383000  | -0.58612500 | 2.77445300 |
| C | 5.53029300  | 0.51251600  | 1.94273000 |
| C | 4.03906500  | -2.41618900 | 4.42635200 |
| C | 4.27218300  | -2.73301500 | 3.00802600 |
| C | 5.01355700  | -1.84172700 | 2.22955200 |
| C | -3.56596700 | 4.36876100  | 1.02696900 |
| C | -4.39873200 | 3.56414500  | 1.80594400 |
| C | -4.27871400 | 3.63377500  | 3.27063000 |
| C | 2.25034900  | -3.85743800 | 4.53356500 |
| C | 2.40509000  | -4.22732000 | 3.11769200 |
| C | 3.49726000  | -3.72820500 | 2.40448700 |
| C | -5.09039400 | 2.49188000  | 1.23564300 |
| C | -5.43379500 | 1.42268300  | 2.06572400 |
| C | -5.26423400 | 1.57582400  | 3.51902900 |
| C | -5.59216500 | 0.13763600  | 1.53821400 |
| C | -5.35431400 | -0.94866100 | 2.38500100 |
| C | -5.19476900 | -0.69877400 | 3.82705000 |
| C | -4.95327800 | -2.18638700 | 1.86952400 |
| C | -4.22136100 | -3.03479300 | 2.70314500 |
| C | -4.10607600 | -2.70020600 | 4.13099400 |
| C | -3.34429500 | -3.98113600 | 2.16418700 |
| C | -2.27210700 | -4.40196000 | 2.95289800 |
| C | -2.23957100 | -4.01802900 | 4.37235800 |

|   |             |             |             |
|---|-------------|-------------|-------------|
| C | -1.10401800 | -4.89323200 | 2.36408700  |
| C | 0.08293000  | -4.81281300 | 3.09574900  |
| C | 0.01994300  | -4.42146400 | 4.51271500  |
| C | 1.32083100  | -4.80097100 | 2.44855900  |
| H | 3.38472800  | 4.54091700  | 0.19305900  |
| H | 1.10211600  | 5.47346600  | -0.03799200 |
| H | -1.36658100 | 5.36918000  | -0.12598700 |
| H | 5.04253200  | 2.73182700  | 0.52330600  |
| H | 5.68921700  | 0.36746200  | 0.87676000  |
| H | 5.15480100  | -2.02890000 | 1.16738800  |
| H | -3.58972600 | 4.29027000  | -0.05606700 |
| H | 3.60366900  | -3.94164000 | 1.34321900  |
| H | -5.14537600 | 2.38275500  | 0.15598000  |
| H | -5.66818100 | -0.01384700 | 0.46417800  |
| H | -5.01081400 | -2.38304400 | 0.80144200  |
| H | -3.36450500 | -4.20564200 | 1.10082600  |
| H | -1.07907400 | -5.12263500 | 1.30188900  |
| H | 1.38768500  | -5.02720100 | 1.38718900  |
| N | 5.03829400  | 0.88131600  | 4.73380400  |
| N | 2.95239400  | 4.73104600  | 4.10708200  |
| N | -1.41269600 | 5.50859300  | 3.81307600  |
| N | -4.86471400 | 2.73150300  | 4.07367700  |
| N | -4.73705800 | -1.64176200 | 4.66624500  |
| N | -1.14855600 | -4.19588800 | 5.13495600  |
| N | 3.15897100  | -3.10244500 | 5.17365900  |
| N | 1.12296000  | -4.11589300 | 5.21631800  |
| N | -3.23833500 | -3.32472100 | 4.94279500  |
| N | -5.33010500 | 0.52829600  | 4.35635600  |
| N | -3.45033700 | 4.49924000  | 3.87778400  |
| N | 0.85949000  | 5.59538900  | 3.89404700  |
| N | 4.45539900  | 3.05309900  | 4.40972500  |
| N | 4.56642200  | -1.32475100 | 5.00567400  |
| C | 4.08898000  | 2.92481700  | -2.54529300 |
| C | 4.29473500  | 2.88351000  | -3.99987000 |
| C | 3.46465500  | 3.66353100  | -4.80884000 |
| C | 2.32245700  | 4.23780700  | -4.24365500 |
| C | 2.18216400  | 4.19816800  | -2.78121700 |
| C | 1.20565700  | 4.59610300  | -5.00582600 |
| C | -0.04458200 | 4.65382300  | -4.38392500 |
| C | -0.08727300 | 4.58312600  | -2.91618000 |
| C | -1.24700700 | 4.51549500  | -5.08692500 |
| C | -2.38229700 | 4.07237300  | -4.40190600 |
| C | -2.32370900 | 4.02496500  | -2.93387600 |
| C | 5.24454000  | 0.95766900  | -2.23803300 |
| C | 5.47430000  | 0.81574400  | -3.68252300 |
| C | 5.10396300  | 1.86844500  | -4.52019000 |

|   |             |             |             |
|---|-------------|-------------|-------------|
| C | 5.33677000  | -1.31183100 | -1.91175900 |
| C | 5.58341300  | -1.55357700 | -3.34045600 |
| C | 5.77827800  | -0.45581700 | -4.17744000 |
| C | 4.33353000  | -3.35610400 | -1.65658900 |
| C | 4.56798000  | -3.70072400 | -3.06645300 |
| C | 5.31714000  | -2.82551200 | -3.85055000 |
| C | -3.45421900 | 3.43563000  | -5.03839700 |
| C | -4.27283800 | 2.58177300  | -4.29149600 |
| C | -4.14125600 | 2.60807600  | -2.82688800 |
| C | 2.50406200  | -4.73091200 | -1.54488800 |
| C | 2.66682500  | -5.14846800 | -2.94450800 |
| C | 3.79221800  | -4.70624400 | -3.64081300 |
| C | -4.99365900 | 1.52870100  | -4.86643000 |
| C | -5.32676300 | 0.42883900  | -4.06734200 |
| C | -5.17884400 | 0.56497200  | -2.61020300 |
| C | -5.50657500 | -0.85684200 | -4.58928600 |
| C | -5.25435200 | -1.95461500 | -3.75703100 |
| C | -5.12684700 | -1.71176000 | -2.31211400 |
| C | -4.82756500 | -3.19105800 | -4.25163900 |
| C | -4.04734500 | -4.00776600 | -3.42435900 |
| C | -3.95481700 | -3.66469900 | -1.99785900 |
| C | -3.13859900 | -4.94080400 | -3.93220800 |
| C | -2.03886700 | -5.30457700 | -3.14930700 |
| C | -2.01425100 | -4.88485200 | -1.74100500 |
| C | -0.85902800 | -5.81094600 | -3.70196400 |
| C | 0.32973500  | -5.69097200 | -2.98104200 |
| C | 0.26003800  | -5.24628500 | -1.58216200 |
| C | 1.58344100  | -5.73383200 | -3.59587600 |
| H | 3.58781400  | 3.64845600  | -5.88756800 |
| H | 1.27528800  | 4.62481200  | -6.08905400 |
| H | -1.24671800 | 4.54981600  | -6.17220300 |
| H | 5.25521800  | 1.79001800  | -5.59249800 |
| H | 5.94176600  | -0.60262500 | -5.24054100 |
| H | 5.47789200  | -3.03686400 | -4.90297700 |
| H | -3.51580900 | 3.43400900  | -6.12248600 |
| H | 3.92957100  | -4.97471500 | -4.68346300 |
| H | -5.08675300 | 1.46248000  | -5.94621600 |
| H | -5.59863700 | -0.99919700 | -5.66178100 |
| H | -4.89740400 | -3.40523900 | -5.31386600 |
| H | -3.16950000 | -5.21385600 | -4.98277300 |
| H | -0.83389600 | -6.11748900 | -4.74332200 |
| H | 1.67043400  | -6.03587300 | -4.63497900 |
| N | 5.38624500  | -0.07140800 | -1.39275900 |
| N | 3.14298200  | 3.70018400  | -1.98863400 |
| N | -1.24382400 | 4.43165800  | -2.25148700 |
| N | -4.75064900 | 1.70428800  | -2.04450000 |

|    |             |             |             |
|----|-------------|-------------|-------------|
| N  | -4.65831500 | -2.64517300 | -1.47310100 |
| N  | -0.91924500 | -5.00848700 | -0.98112000 |
| N  | 3.44542600  | -4.02043100 | -0.90570000 |
| N  | 1.35920300  | -4.94539100 | -0.87796900 |
| N  | -3.05084200 | -4.22879400 | -1.18723900 |
| N  | -5.29256300 | -0.48645500 | -1.78559100 |
| N  | -3.28761000 | 3.43685300  | -2.20697700 |
| N  | 1.02919900  | 4.52588600  | -2.17531300 |
| N  | 4.72642400  | 2.08477100  | -1.71730400 |
| N  | 4.90849400  | -2.27980700 | -1.09191100 |
| C  | 0.46567900  | 1.61971500  | -0.44576100 |
| C  | -0.83831200 | 1.32897200  | -0.70741300 |
| C  | 0.25800200  | -0.58271300 | -0.46027800 |
| H  | 0.97699600  | 2.56659000  | -0.40020600 |
| H  | -1.68183300 | 1.97352800  | -0.89646500 |
| H  | 0.50009800  | -1.63161700 | -0.45761000 |
| N  | 1.12447100  | 0.41340500  | -0.27933200 |
| N  | -0.94837500 | -0.05505800 | -0.69490100 |
| C  | 2.54596500  | 0.22280600  | 0.01659400  |
| H  | 2.68915100  | 0.11884300  | 1.09305700  |
| H  | 2.88680300  | -0.66876300 | -0.50524000 |
| H  | 3.10043300  | 1.08262600  | -0.34929200 |
| C  | -2.14902500 | -0.82649000 | -1.01355600 |
| H  | -2.12223500 | -1.78325700 | -0.49613500 |
| Cl | 1.83803900  | -1.68244500 | -3.01560900 |
| H  | -2.19163900 | -1.00255700 | -2.08951200 |
| H  | -3.03071100 | -0.26937500 | -0.70546700 |
| C  | -1.96626700 | -0.07038700 | 2.42789200  |
| O  | -2.35387600 | 1.02227600  | 2.41032800  |
| O  | -1.57928800 | -1.16560000 | 2.41645000  |

**BP-MIMCl-CO<sub>2</sub> (Orientation 2-near anion)**

|   |             |            |            |
|---|-------------|------------|------------|
| C | 4.78263700  | 2.57036900 | 3.80241300 |
| C | 4.97293200  | 2.51069000 | 2.34364500 |
| C | 4.39110500  | 3.50233500 | 1.54966300 |
| C | 3.48473700  | 4.37763700 | 2.15434300 |
| C | 3.36121100  | 4.36861900 | 3.62146700 |
| C | 2.49718200  | 5.01924600 | 1.40206100 |
| C | 1.33717300  | 5.43487300 | 2.05943700 |
| C | 1.30044900  | 5.38688400 | 3.53029300 |
| C | 0.13641700  | 5.59407100 | 1.36183500 |
| C | -1.05725700 | 5.49012600 | 2.07822300 |
| C | -0.99934500 | 5.43846000 | 3.54810900 |
| C | 5.26532500  | 0.33519300 | 4.03049300 |
| C | 5.48299800  | 0.18387700 | 2.58219100 |
| C | 5.44173800  | 1.32285800 | 1.77433200 |



|   |             |             |            |
|---|-------------|-------------|------------|
| C | 4.69386200  | -1.87951200 | 4.25386700 |
| C | 4.88022300  | -2.12135100 | 2.81352700 |
| C | 5.39270800  | -1.09327000 | 2.01905400 |
| C | 3.19894600  | -3.61740700 | 4.43223400 |
| C | 3.31388800  | -3.92356000 | 2.99688900 |
| C | 4.25155200  | -3.22717700 | 2.23201100 |
| C | -2.24626400 | 5.12701500  | 1.43842000 |
| C | -3.24726500 | 4.52891400  | 2.20581800 |
| C | -3.10024600 | 4.51065400  | 3.67026300 |
| C | 1.09733900  | -4.54679800 | 4.53998800 |
| C | 1.12444300  | -4.88780800 | 3.10846200 |
| C | 2.29415100  | -4.65708200 | 2.38237000 |
| C | -4.19731900 | 3.69059100  | 1.61318900 |
| C | -4.80229900 | 2.72036200  | 2.41459400 |
| C | -4.58928600 | 2.77090400  | 3.87014900 |
| C | -5.32082400 | 1.55030900  | 1.84961500 |
| C | -5.39604700 | 0.41440000  | 2.65905200 |
| C | -5.15706600 | 0.55685600  | 4.10448500 |
| C | -5.36931800 | -0.86518700 | 2.09517000 |
| C | -4.89786600 | -1.91549300 | 2.88716000 |
| C | -4.68072700 | -1.68009000 | 4.32381200 |
| C | -4.33506100 | -3.05234600 | 2.30004100 |
| C | -3.41845600 | -3.79029400 | 3.05399900 |
| C | -3.26416700 | -3.48328000 | 4.48502600 |
| C | -2.44422600 | -4.56881500 | 2.42442300 |
| C | -1.26968100 | -4.84359700 | 3.13051200 |
| C | -1.20277700 | -4.50046200 | 4.56003600 |
| C | -0.08475700 | -5.13416500 | 2.45150000 |
| H | 4.46173400  | 3.44891400  | 0.46653900 |
| H | 2.52971700  | 4.99221900  | 0.31644700 |
| H | 0.12401400  | 5.56915300  | 0.27585100 |
| H | 5.54546000  | 1.23531000  | 0.69590500 |
| H | 5.49183400  | -1.22762400 | 0.94472700 |
| H | 4.31745600  | -3.39554200 | 1.16029300 |
| H | -2.30267100 | 5.10134100  | 0.35377400 |
| H | 2.31755000  | -4.84024200 | 1.31127900 |
| H | -4.29453700 | 3.64351700  | 0.53154100 |
| H | -5.44973200 | 1.46682700  | 0.77292800 |
| H | -5.49598600 | -0.99683900 | 1.02279800 |
| H | -4.43390500 | -3.22262400 | 1.23053400 |
| H | -2.50143900 | -4.75586300 | 1.35489500 |
| H | -0.10146200 | -5.32493500 | 1.38143000 |
| N | 5.05411000  | -0.72167600 | 4.83167600 |
| N | 4.13243500  | 3.58617700  | 4.39366900 |
| N | 0.15895500  | 5.55516500  | 4.21810600 |
| N | -3.89120200 | 3.75921300  | 4.45365400 |

|   |             |             |             |
|---|-------------|-------------|-------------|
| N | -4.98220300 | -0.50717600 | 4.90515100  |
| N | -2.25662000 | -3.98741200 | 5.21679400  |
| N | 2.18305300  | -4.08062500 | 5.17919600  |
| N | -0.04677500 | -4.52704800 | 5.24407300  |
| N | -4.02076200 | -2.55750000 | 5.09771200  |
| N | -4.93587500 | 1.75289500  | 4.67469700  |
| N | -2.07063000 | 5.11141000  | 4.28952300  |
| N | 2.36785300  | 5.01384600  | 4.25503600  |
| N | 5.09886300  | 1.53911200  | 4.60232200  |
| N | 4.00603400  | -2.72859600 | 5.03474900  |
| C | 4.68097200  | 1.92089500  | -2.36441700 |
| C | 4.85092200  | 1.87852100  | -3.82433800 |
| C | 4.25107800  | 2.88534300  | -4.58808100 |
| C | 3.30259400  | 3.71155600  | -3.97947700 |
| C | 3.17546900  | 3.65574000  | -2.51526000 |
| C | 2.30953800  | 4.38069800  | -4.70283500 |
| C | 1.12450500  | 4.73516500  | -4.05158000 |
| C | 1.08187200  | 4.61970800  | -2.58584900 |
| C | -0.07970000 | 4.94724400  | -4.73110900 |
| C | -1.28380700 | 4.79146600  | -4.03642100 |
| C | -1.22284700 | 4.67137600  | -2.57235800 |
| C | 5.22347700  | -0.30123000 | -2.14982400 |
| C | 5.39790800  | -0.44843700 | -3.60188000 |
| C | 5.34719000  | 0.70317100  | -4.39444100 |
| C | 4.59026400  | -2.49580700 | -1.91487500 |
| C | 4.74694800  | -2.74434400 | -3.35494100 |
| C | 5.28782400  | -1.72951900 | -4.14919200 |
| C | 3.01303900  | -4.16675300 | -1.71401000 |
| C | 3.12355300  | -4.50216900 | -3.14075900 |
| C | 4.08297600  | -3.84192900 | -3.90864800 |
| C | -2.49281600 | 4.48832600  | -4.67090200 |
| C | -3.50330700 | 3.85801600  | -3.93540600 |
| C | -3.35382900 | 3.79128500  | -2.47442100 |
| C | 0.89747500  | -5.06670500 | -1.58480500 |
| C | 0.92861200  | -5.45953300 | -3.00032300 |
| C | 2.10289800  | -5.25837800 | -3.72156800 |
| C | -4.48635900 | 3.06078700  | -4.53031000 |
| C | -5.10374900 | 2.06846400  | -3.75981300 |
| C | -4.90988000 | 2.10238400  | -2.30299900 |
| C | -5.63623400 | 0.90361500  | -4.32155900 |
| C | -5.70712400 | -0.24717400 | -3.52865600 |
| C | -5.50764100 | -0.10601800 | -2.07924300 |
| C | -5.65506400 | -1.53389300 | -4.07362300 |
| C | -5.15512400 | -2.57253600 | -3.28350500 |
| C | -4.96611700 | -2.32874800 | -1.84638500 |
| C | -4.56387000 | -3.71100800 | -3.83873900 |

|   |             |             |             |
|---|-------------|-------------|-------------|
| C | -3.62671700 | -4.41390500 | -3.08132000 |
| C | -3.47832800 | -4.07669500 | -1.65868700 |
| C | -2.64905700 | -5.21504700 | -3.67438900 |
| C | -1.46604100 | -5.44318100 | -2.97469300 |
| C | -1.39756400 | -5.04527100 | -1.56181100 |
| C | -0.27832000 | -5.75914400 | -3.63223900 |
| H | 4.35464000  | 2.88143500  | -5.66895200 |
| H | 2.37105900  | 4.43493100  | -5.78556300 |
| H | -0.08434400 | 5.02504400  | -5.81411400 |
| H | 5.45854300  | 0.62583500  | -5.47163200 |
| H | 5.38782600  | -1.87434100 | -5.22011500 |
| H | 4.15891000  | -4.04278600 | -4.97255300 |
| H | -2.56561500 | 4.54515300  | -5.75280400 |
| H | 2.14387700  | -5.50814700 | -4.77702600 |
| H | -4.60474800 | 3.06122400  | -5.60966700 |
| H | -5.77014400 | 0.83097700  | -5.39664900 |
| H | -5.78350500 | -1.67828200 | -5.14208900 |
| H | -4.67192500 | -3.91904400 | -4.89879400 |
| H | -2.71727300 | -5.46967600 | -4.72726400 |
| H | -0.29120600 | -6.03100100 | -4.68282300 |
| N | 5.02958400  | -1.35730400 | -1.34807700 |
| N | 3.98782000  | 2.89963500  | -1.76149700 |
| N | -0.06397200 | 4.74952400  | -1.90072800 |
| N | -4.17469100 | 3.05725800  | -1.70998100 |
| N | -5.33241000 | -1.16560100 | -1.27858800 |
| N | -2.46631200 | -4.54823100 | -0.91927300 |
| N | 1.99185900  | -4.59534100 | -0.96216200 |
| N | -0.24213200 | -5.05275000 | -0.88049700 |
| N | -4.27909000 | -3.17293200 | -1.06611500 |
| N | -5.30504000 | 1.09560200  | -1.51135200 |
| N | -2.29913200 | 4.33475800  | -1.84565900 |
| N | 2.15554100  | 4.24585300  | -1.87278700 |
| N | 5.06874400  | 0.90556100  | -1.57848400 |
| N | 3.86532300  | -3.30342600 | -1.12928700 |
| C | 0.73221700  | 1.55679200  | -0.24787500 |
| C | -0.60152800 | 1.54882400  | -0.52290400 |
| C | 0.06297700  | -0.55181900 | -0.31839500 |
| H | 1.42993800  | 2.37434400  | -0.17770900 |
| H | -1.28700000 | 2.36247900  | -0.69910000 |
| H | 0.06803100  | -1.62847500 | -0.35789400 |
| N | 1.12157600  | 0.23559200  | -0.11036100 |
| N | -0.99943000 | 0.22274200  | -0.55030400 |
| C | 2.46173200  | -0.22937000 | 0.25005200  |
| H | 2.59659600  | -0.15670100 | 1.33023200  |
| H | 2.58427500  | -1.26272000 | -0.06744500 |
| H | 3.20187200  | 0.38534900  | -0.25574900 |

|    |             |             |             |
|----|-------------|-------------|-------------|
| C  | -2.33193500 | -0.27251900 | -0.90225400 |
| H  | -2.56237700 | -1.15992500 | -0.31643400 |
| Cl | -0.40075000 | -2.23528000 | -3.10313200 |
| H  | -2.33102200 | -0.54809000 | -1.95812200 |
| H  | -3.06157700 | 0.50392100  | -0.68792700 |
| C  | 2.09313800  | -0.56892000 | -3.95938500 |
| O  | 2.11633900  | 0.02706600  | -2.96104900 |
| O  | 2.18287100  | -1.10177700 | -4.98648300 |

**BP-MPHP-CO<sub>2</sub> (Orientation 1-near cation)**

|   |             |             |            |
|---|-------------|-------------|------------|
| C | 0.39699400  | 5.30273400  | 3.94149500 |
| C | 0.74413200  | 5.36996600  | 2.51201900 |
| C | -0.27129100 | 5.59360400  | 1.58260400 |
| C | -1.59793200 | 5.53492000  | 2.02760300 |
| C | -1.85101700 | 5.44808300  | 3.47609400 |
| C | -2.64201800 | 5.24914500  | 1.14636200 |
| C | -3.79995000 | 4.65892300  | 1.66656100 |
| C | -3.94712200 | 4.57144900  | 3.12975400 |
| C | -4.60905600 | 3.84795100  | 0.86646200 |
| C | -5.32253200 | 2.81845200  | 1.48748000 |
| C | -5.40712800 | 2.80486700  | 2.95802000 |
| C | 2.35941800  | 4.21073500  | 4.44210300 |
| C | 2.79616500  | 4.25008700  | 3.03684000 |
| C | 2.00976900  | 4.92811700  | 2.10604500 |
| C | 3.67617300  | 2.37498400  | 4.87379700 |
| C | 4.18237700  | 2.35163200  | 3.49171500 |
| C | 3.80362700  | 3.37258700  | 2.61852600 |
| C | 4.08938200  | 0.12917700  | 5.14017600 |
| C | 4.61403700  | 0.01373100  | 3.76969400 |
| C | 4.75607300  | 1.17343400  | 3.00253600 |
| C | -5.63839900 | 1.64790800  | 0.79094900 |
| C | -5.82593700 | 0.47465100  | 1.52554300 |
| C | -5.92726400 | 0.56359000  | 2.99233600 |
| C | 3.50647600  | -2.09361700 | 5.18469200 |
| C | 3.99413300  | -2.29835200 | 3.81099800 |
| C | 4.65479600  | -1.24619200 | 3.16683200 |
| C | -5.63016600 | -0.78031500 | 0.94028300 |
| C | -5.35955500 | -1.86403600 | 1.77826700 |
| C | -5.49526400 | -1.68575400 | 3.23423300 |
| C | -4.71343500 | -3.00629100 | 1.29401400 |
| C | -4.04791600 | -3.82340800 | 2.21073900 |
| C | -4.21747300 | -3.55454700 | 3.64888000 |
| C | -3.00876700 | -4.66538000 | 1.79994700 |
| C | -2.03799200 | -5.01472100 | 2.74266600 |
| C | -2.27725600 | -4.67890700 | 4.15667700 |
| C | -0.73712500 | -5.34661900 | 2.34416700 |

|   |             |             |             |
|---|-------------|-------------|-------------|
| C | 0.30345200  | -5.10907900 | 3.24504500  |
| C | -0.03273800 | -4.78293200 | 4.64136500  |
| C | 1.60606900  | -4.86031300 | 2.79245000  |
| C | 2.45544700  | -4.12414500 | 3.62028900  |
| C | 2.03617000  | -3.85080600 | 5.00499700  |
| C | 3.52503100  | -3.39496100 | 3.08532200  |
| H | -0.04152600 | 5.59089800  | 0.52268200  |
| H | -2.46063800 | 5.25741600  | 0.07665000  |
| H | -4.47758100 | 3.84822400  | -0.21072300 |
| H | 2.28758800  | 4.92274100  | 1.05739800  |
| H | 4.13311700  | 3.35316900  | 1.58370600  |
| H | 5.11275100  | 1.11011500  | 1.97718400  |
| H | -5.50393200 | 1.60049000  | -0.28504900 |
| H | 4.99920300  | -1.35981200 | 2.14110700  |
| H | -5.47975700 | -0.86894900 | -0.13217800 |
| H | -4.55204100 | -3.13431400 | 0.22665400  |
| H | -2.83459500 | -4.84090000 | 0.74155000  |
| H | -0.51728200 | -5.55458400 | 1.30029900  |
| H | 1.87101400  | -5.03211200 | 1.75196800  |
| H | 3.83132500  | -3.54275800 | 2.05205200  |
| N | 2.92723700  | 3.38794600  | 5.33933200  |
| N | -0.85637000 | 5.50688200  | 4.37643300  |
| N | -4.86639900 | 3.78076000  | 3.70564100  |
| N | -5.91728600 | -0.52955900 | 3.77073500  |
| N | -3.42606300 | -4.12388900 | 4.57211400  |
| N | 0.88946300  | -4.33398900 | 5.50808000  |
| N | 3.72060800  | -0.94782000 | 5.85238100  |
| N | 2.68474600  | -2.96967000 | 5.78416500  |
| N | -1.30176400 | -4.75014100 | 5.07702200  |
| N | -5.05522100 | -2.60949100 | 4.10284200  |
| N | -5.86996400 | 1.74195500  | 3.63395400  |
| N | -3.05983500 | 5.13255000  | 3.96674400  |
| N | 1.27271800  | 4.87560300  | 4.86614700  |
| N | 3.80178900  | 1.31872100  | 5.69384600  |
| C | 2.48639100  | 4.62278400  | -1.83096500 |
| C | 2.82930600  | 4.71440500  | -3.25699400 |
| C | 1.79450200  | 4.93058000  | -4.16866600 |
| C | 0.47427400  | 4.81507300  | -3.72643600 |
| C | 0.22642400  | 4.70241100  | -2.28186000 |
| C | -0.58353800 | 4.55576300  | -4.59843000 |
| C | -1.75239300 | 3.99223000  | -4.08761300 |
| C | -1.90084100 | 3.88702000  | -2.62969700 |
| C | -2.64720300 | 3.29478900  | -4.89874500 |
| C | -3.49915100 | 2.36279100  | -4.30900700 |
| C | -3.57033000 | 2.30921900  | -2.84400000 |
| C | 4.45933100  | 3.54821300  | -1.34655500 |

|   |             |             |             |
|---|-------------|-------------|-------------|
| C | 4.89219900  | 3.59527100  | -2.75052100 |
| C | 4.10515100  | 4.30679800  | -3.65848200 |
| C | 5.68450900  | 1.64700300  | -0.94927700 |
| C | 6.18825500  | 1.61852000  | -2.33120800 |
| C | 5.87310900  | 2.69105800  | -3.16963800 |
| C | 5.91977700  | -0.63046800 | -0.73213900 |
| C | 6.44954300  | -0.75857500 | -2.09911300 |
| C | 6.69382800  | 0.41172100  | -2.82421800 |
| C | -4.02640000 | 1.29796400  | -5.04050800 |
| C | -4.36867400 | 0.13243300  | -4.35632700 |
| C | -4.42054400 | 0.17506900  | -2.88973700 |
| C | 5.14101600  | -2.79578700 | -0.74349700 |
| C | 5.64379400  | -3.02251600 | -2.10775200 |
| C | 6.41279200  | -2.01792600 | -2.70425100 |
| C | -4.28695300 | -1.11187400 | -4.98142400 |
| C | -4.02236900 | -2.23020500 | -4.18895800 |
| C | -4.13750400 | -2.09370300 | -2.73084100 |
| C | -3.36502900 | -3.34866200 | -4.70028300 |
| C | -2.65221500 | -4.16323000 | -3.81816600 |
| C | -2.83399000 | -3.95401700 | -2.37543700 |
| C | -1.58474500 | -4.95366500 | -4.24404300 |
| C | -0.60554200 | -5.31579000 | -3.31681100 |
| C | -0.85560500 | -5.03684900 | -1.89562300 |
| C | 0.68743300  | -5.67398400 | -3.70389300 |
| C | 1.73064200  | -5.51541400 | -2.78973200 |
| C | 1.39223900  | -5.19543600 | -1.39434000 |
| C | 3.06081400  | -5.37863900 | -3.19742000 |
| C | 3.95334400  | -4.71198100 | -2.35601000 |
| C | 3.52048500  | -4.41368300 | -0.98178900 |
| C | 5.10688500  | -4.08510700 | -2.83837200 |
| H | 2.00739900  | 4.99091800  | -5.23160000 |
| H | -0.43372600 | 4.61664400  | -5.67178100 |
| H | -2.54200700 | 3.32717000  | -5.97816000 |
| H | 4.38223800  | 4.34443300  | -4.70761800 |
| H | 6.20667400  | 2.69040800  | -4.20291700 |
| H | 7.06464700  | 0.35278000  | -3.84306000 |
| H | -3.94375700 | 1.29013500  | -6.12189700 |
| H | 6.78498400  | -2.14687100 | -3.71613900 |
| H | -4.18876200 | -1.17282600 | -6.06018300 |
| H | -3.23094000 | -3.45896900 | -5.77137000 |
| H | -1.41362000 | -5.11024700 | -5.30424800 |
| H | 0.90500100  | -5.87859900 | -4.74770000 |
| H | 3.33958600  | -5.59805700 | -4.22364200 |
| H | 5.44453600  | -4.27474200 | -3.85281300 |
| N | 5.00767300  | 2.69916200  | -0.46595900 |
| N | 1.22691200  | 4.77962100  | -1.39173100 |

|   |             |             |             |
|---|-------------|-------------|-------------|
| N | -2.89613500 | 3.17608100  | -2.07090000 |
| N | -4.52037100 | -0.94423000 | -2.15644800 |
| N | -2.02487700 | -4.53172000 | -1.47129000 |
| N | 2.32800400  | -4.81792300 | -0.51228700 |
| N | 5.45295900  | -1.68970500 | -0.05346500 |
| N | 4.23108800  | -3.60738000 | -0.18123500 |
| N | 0.11636400  | -5.13464900 | -0.97462900 |
| N | -3.70584600 | -3.05404600 | -1.89712700 |
| N | -4.19658900 | 1.30784000  | -2.20471700 |
| N | -0.98487500 | 4.39167200  | -1.79031700 |
| N | 3.38003700  | 4.21957300  | -0.91605200 |
| N | 5.73591900  | 0.56648800  | -0.15644700 |
| C | -1.59135100 | -0.10935100 | -0.25157300 |
| C | -1.25134400 | -1.43963900 | -0.40390500 |
| C | -0.98596900 | -2.21132000 | 0.71846700  |
| C | -1.10127800 | -1.63418900 | 1.98493800  |
| C | -1.44051500 | -0.30150000 | 2.08972300  |
| N | -1.66532700 | 0.44012300  | 0.97758000  |
| H | -0.69999600 | -3.24702600 | 0.59342100  |
| H | -1.79828500 | 0.53696600  | -1.08913300 |
| H | -1.18148300 | -1.83749200 | -1.40104200 |
| H | -0.92883700 | -2.20554000 | 2.88753700  |
| H | -1.53587300 | 0.20945900  | 3.03831600  |
| C | -1.89354200 | 1.89740000  | 1.09841000  |
| H | -2.48808900 | 2.09217600  | 1.98792700  |
| H | -0.92587500 | 2.39403400  | 1.16705600  |
| H | -2.41142700 | 2.25013400  | 0.20920300  |
| P | -0.39256600 | -0.19568000 | -4.10393900 |
| F | -0.28832000 | 1.37305400  | -3.60034600 |
| F | -1.30896600 | 0.27771500  | -5.38027800 |
| F | -0.55662200 | -1.76248200 | -4.55666500 |
| F | 0.95657900  | -0.03553600 | -4.97840800 |
| F | 0.47716200  | -0.66388900 | -2.79299900 |
| F | -1.77491400 | -0.34752100 | -3.19966100 |
| C | 1.71115900  | 1.42139800  | -1.35032000 |
| O | 0.93665900  | 1.38046400  | -0.48789600 |
| O | 2.50442200  | 1.47738100  | -2.19476300 |

**BP-MPHP-CO<sub>2</sub> (Orientation 2-near anion)**

|   |            |            |            |
|---|------------|------------|------------|
| C | 5.68151400 | 0.89416700 | 3.61293400 |
| C | 5.75993700 | 0.73455000 | 2.15110400 |
| C | 5.52920700 | 1.84692200 | 1.33894300 |
| C | 5.01795400 | 3.00093600 | 1.94164400 |
| C | 4.97624300 | 3.07275400 | 3.41214900 |
| C | 4.27340500 | 3.92249200 | 1.20219900 |
| C | 3.35545400 | 4.72365700 | 1.88881100 |

|   |             |             |            |
|---|-------------|-------------|------------|
| C | 3.38847700  | 4.73477900  | 3.36128900 |
| C | 2.23792900  | 5.25219600  | 1.23876100 |
| C | 1.11668300  | 5.56731100  | 2.01179000 |
| C | 1.24373800  | 5.55597500  | 3.47935400 |
| C | 5.35656600  | -1.36106600 | 3.91691300 |
| C | 5.42106500  | -1.61369200 | 2.46777500 |
| C | 5.74015100  | -0.55584900 | 1.61325000 |
| C | 4.07042400  | -3.23529300 | 4.26244700 |
| C | 4.07244500  | -3.55887800 | 2.82617200 |
| C | 4.85759700  | -2.78919900 | 1.96414200 |
| C | 2.09053600  | -4.35874800 | 4.58896900 |
| C | 2.00268900  | -4.71502800 | 3.16307700 |
| C | 3.07266600  | -4.39501600 | 2.32337300 |
| C | -0.16237400 | 5.59460400  | 1.44980600 |
| C | -1.25678500 | 5.39488700  | 2.29510200 |
| C | -1.03424200 | 5.38998100  | 3.75135200 |
| C | -0.18937800 | -4.52061500 | 4.84595600 |
| C | -0.37266600 | -4.87554500 | 3.42853100 |
| C | 0.76009900  | -5.07217700 | 2.63439200 |
| C | -2.47245000 | 4.91281300  | 1.80111000 |
| C | -3.32268900 | 4.24588600  | 2.68580400 |
| C | -3.00910500 | 4.27210700  | 4.12452800 |
| C | -4.26044800 | 3.31944900  | 2.21952000 |
| C | -4.67659000 | 2.31364000  | 3.09423000 |
| C | -4.29389900 | 2.40600800  | 4.51312000 |
| C | -5.15204800 | 1.09357900  | 2.60392500 |
| C | -5.01860100 | -0.03282500 | 3.41874200 |
| C | -4.61980000 | 0.15269000  | 4.82385500 |
| C | -4.93562400 | -1.31081400 | 2.85863300 |
| C | -4.27044700 | -2.30025900 | 3.58699700 |
| C | -3.91498800 | -2.02813600 | 4.98994600 |
| C | -3.66820800 | -3.38236900 | 2.93935200 |
| C | -2.60536600 | -4.02140900 | 3.58274400 |
| C | -2.32995700 | -3.69303100 | 4.99156700 |
| C | -1.63484400 | -4.71227000 | 2.85242400 |
| H | 5.52947800  | 1.74889600  | 0.25870200 |
| H | 4.24284600  | 3.86167200  | 0.11968100 |
| H | 2.16195600  | 5.21064800  | 0.15781400 |
| H | 5.74720000  | -0.70033500 | 0.53840300 |
| H | 4.84265900  | -2.97483600 | 0.89596100 |
| H | 3.01579900  | -4.60053100 | 1.26044000 |
| H | -0.28937700 | 5.55109000  | 0.37383700 |
| H | 0.65744300  | -5.28382600 | 1.57601100 |
| H | -2.64943900 | 4.86039100  | 0.73276100 |
| H | -4.48162900 | 3.24812000  | 1.16067700 |
| H | -5.40128600 | 0.98338500  | 1.55451200 |



|   |             |             |             |
|---|-------------|-------------|-------------|
| H | -5.17562900 | -1.46550200 | 1.81243800  |
| H | -3.86968700 | -3.57456400 | 1.89124500  |
| H | -1.78680000 | -4.91736700 | 1.79851600  |
| N | 4.83970100  | -2.25923700 | 4.77158600  |
| N | 5.46493100  | 2.08945400  | 4.18534200  |
| N | 2.41355500  | 5.30327100  | 4.08837000  |
| N | -1.97990600 | 4.98305800  | 4.61289200  |
| N | -4.44357700 | 1.37243000  | 5.35714800  |
| N | -3.09686700 | -2.83565800 | 5.68410900  |
| N | 1.02822200  | -4.43913700 | 5.40664200  |
| N | -1.21090400 | -4.10258100 | 5.61067500  |
| N | -4.25374100 | -0.88060200 | 5.59940600  |
| N | -3.62860100 | 3.46553400  | 5.00102600  |
| N | 0.17307000  | 5.63640300  | 4.28502400  |
| N | 4.30427400  | 4.04060200  | 4.05608100  |
| N | 5.65629800  | -0.16205300 | 4.44227200  |
| N | 3.18571400  | -3.78326900 | 5.11160800  |
| C | 5.05470000  | 1.19657400  | -2.59154000 |
| C | 5.11726300  | 1.08498200  | -4.05649500 |
| C | 4.60050900  | 2.13629200  | -4.81818000 |
| C | 3.81335200  | 3.09799800  | -4.17568500 |
| C | 3.81513900  | 3.12452400  | -2.70575200 |
| C | 2.82813100  | 3.82834100  | -4.84402800 |
| C | 1.75120400  | 4.33303300  | -4.10663700 |
| C | 1.83940400  | 4.29914100  | -2.64044900 |
| C | 0.51220300  | 4.62051200  | -4.68208000 |
| C | -0.62487900 | 4.63806400  | -3.86875000 |
| C | -0.44184400 | 4.56760200  | -2.41303600 |
| C | 5.23668100  | -1.07505800 | -2.32649200 |
| C | 5.31208300  | -1.29258800 | -3.77973900 |
| C | 5.39510200  | -0.16942600 | -4.60918300 |
| C | 4.32430700  | -3.15579100 | -1.97694900 |
| C | 4.36680500  | -3.47212400 | -3.41261500 |
| C | 4.99863100  | -2.56472300 | -4.26979700 |
| C | 2.55413000  | -4.57643100 | -1.62655800 |
| C | 2.52123200  | -4.96376800 | -3.04411300 |
| C | 3.53345500  | -4.48997000 | -3.88387800 |
| C | -1.91295100 | 4.46568600  | -4.37813200 |
| C | -2.92953700 | 4.04287400  | -3.52102800 |
| C | -2.65305900 | 3.99189100  | -2.08030000 |
| C | 0.33143000  | -5.10194500 | -1.34164200 |
| C | 0.19910800  | -5.50751500 | -2.74807800 |
| C | 1.34969500  | -5.53827500 | -3.54034200 |
| C | -4.08402200 | 3.41704900  | -3.99355300 |
| C | -4.80763900 | 2.60210600  | -3.12384000 |
| C | -4.46696800 | 2.62800000  | -1.69610900 |

|   |             |             |             |
|---|-------------|-------------|-------------|
| C | -5.60546200 | 1.55770300  | -3.59451000 |
| C | -5.82283100 | 0.46636900  | -2.75355000 |
| C | -5.44939500 | 0.59036800  | -1.33835100 |
| C | -6.01040500 | -0.81229100 | -3.27908100 |
| C | -5.57400800 | -1.90008200 | -2.52197600 |
| C | -5.21950200 | -1.67349600 | -1.11538900 |
| C | -5.14989700 | -3.08071900 | -3.13158600 |
| C | -4.21841900 | -3.87671800 | -2.46374400 |
| C | -3.91717600 | -3.56713800 | -1.06074400 |
| C | -3.37221700 | -4.75073200 | -3.14539400 |
| C | -2.16563000 | -5.11911500 | -2.54850300 |
| C | -1.93950000 | -4.74271800 | -1.14659000 |
| C | -1.08462400 | -5.60065300 | -3.28853400 |
| H | 4.60975500  | 2.07853000  | -5.90231600 |
| H | 2.78708600  | 3.82214800  | -5.92895700 |
| H | 0.40533800  | 4.64207300  | -5.76230900 |
| H | 5.43239000  | -0.29198100 | -5.68736200 |
| H | 5.02985900  | -2.75857100 | -5.33778500 |
| H | 3.52487800  | -4.74147000 | -4.94007300 |
| H | -2.07971900 | 4.48045800  | -5.45048700 |
| H | 1.28058300  | -5.81777600 | -4.58719900 |
| H | -4.29429500 | 3.39823700  | -5.05792100 |
| H | -5.83799800 | 1.48520800  | -4.65196200 |
| H | -6.24455300 | -0.94034900 | -4.33051000 |
| H | -5.36504600 | -3.25875100 | -4.17992800 |
| H | -3.55627900 | -4.98261200 | -4.18961000 |
| H | -1.21788000 | -5.87211500 | -4.33123700 |
| N | 4.92425300  | -2.06357800 | -1.47660200 |
| N | 4.57887600  | 2.29400200  | -1.98294500 |
| N | 0.78010200  | 4.55641000  | -1.85747800 |
| N | -3.50957600 | 3.43485500  | -1.21222300 |
| N | -5.37367900 | -0.47625600 | -0.52890100 |
| N | -2.88316900 | -4.12775700 | -0.41753600 |
| N | 1.52352800  | -4.80943200 | -0.80139100 |
| N | -0.73948400 | -4.88125700 | -0.56359900 |
| N | -4.56670700 | -2.59843400 | -0.39541500 |
| N | -4.97777200 | 1.73993800  | -0.83031200 |
| N | -1.47185500 | 4.38350700  | -1.57431600 |
| N | 2.93930500  | 3.86491800  | -2.00896800 |
| N | 5.30707000  | 0.15301800  | -1.78968700 |
| N | 3.55576900  | -3.84135900 | -1.11992300 |
| C | -0.88567800 | 1.33719500  | 0.17059600  |
| C | -2.00059100 | 0.53736400  | 0.33221400  |
| C | -1.84515200 | -0.84266500 | 0.41841800  |
| C | -0.56578900 | -1.39363300 | 0.34559600  |
| C | 0.51762000  | -0.55193300 | 0.20231200  |

|   |             |             |             |
|---|-------------|-------------|-------------|
| N | 0.34976900  | 0.78985400  | 0.12270900  |
| H | -2.71299900 | -1.48540000 | 0.49966000  |
| H | -0.95212900 | 2.41013400  | 0.03831300  |
| H | -2.98058600 | 0.99560500  | 0.32736000  |
| H | -0.41258900 | -2.46589200 | 0.36727900  |
| H | 1.53579600  | -0.91355200 | 0.13773100  |
| C | 1.53774600  | 1.66446500  | -0.02381900 |
| H | 2.03440800  | 1.76147700  | 0.94206300  |
| H | 2.22503200  | 1.23214100  | -0.74763900 |
| H | 1.22322400  | 2.64278600  | -0.37731600 |
| P | -1.91041300 | -0.39785500 | -3.49353400 |
| F | -2.01188600 | 1.08547900  | -4.18467500 |
| F | -3.14761100 | -0.92870800 | -4.42899400 |
| F | -1.82692000 | -1.86893900 | -2.76608300 |
| F | -0.82478900 | -0.87139100 | -4.61058300 |
| F | -0.68171000 | 0.14259600  | -2.53469500 |
| F | -2.98972900 | 0.08250000  | -2.34983900 |
| C | 1.76356400  | -0.89325700 | -3.07210200 |
| O | 2.15099200  | 0.19014800  | -3.23461800 |
| O | 1.43631600  | -1.99105900 | -2.89728400 |

1. Kresse, G. and J. Furthmüller, *Efficient iterative schemes for ab initio total-energy calculations using a plane-wave basis set*. Physical review B, 1996. **54**(16): p. 11169.
2. Janesko, B.G., T.M. Henderson, and G.E. Scuseria, *Screened hybrid density functionals for solid-state chemistry and physics*. Physical Chemistry Chemical Physics, 2009. **11**(3): p. 443-454.
3. Ramzan, M., et al., *Electronic, mechanical and optical properties of Y2O3 with hybrid density functional (HSE06)*. Computational materials science, 2013. **71**: p. 19-24.
